# Supplementary material for: Long noncoding RNA licensing of obesity-linked hepatic lipogenesis and NAFLD pathogenesis
Source: PubMed Central journal article supplement (PMC6065308; doi:10.1038/s41467-018-05383-2), 2018-07-30
Supplement: 41467_2018_5383_MOESM1_ESM.pdf [file 41467_2018_5383_MOESM1_ESM.pdf]

## **SUPPLEMENTARY INFORMATION**

### **Long noncoding RNA licensing of obesity linked hepatic lipogenesis and NAFLD pathogenesis**

Zhao et al.

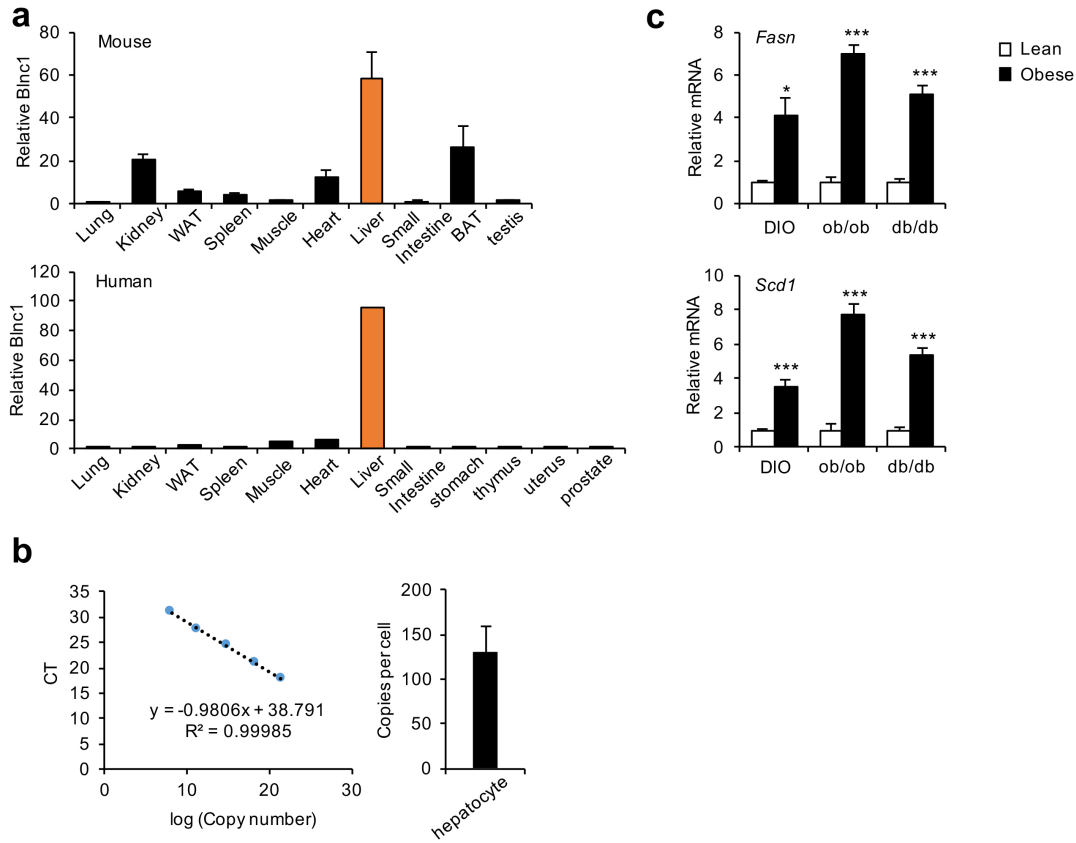

**Supplementary Figure. 1. Blnc1 expression is enriched in the liver and linked to lipogenic induction in obesity.** **a** qPCR analysis of Blnc1 expression in mouse and human tissues. The human tissue RNA panel was purchased from Clontech. **b** Copy number of Blnc1 RNA per hepatocyte (right). Standard curve generated using in vitro transcribed Blnc1 RNA (left). **c** qPCR analysis of *Fasn* and *Scd1* mRNA expression in the livers from lean (open) and obese (filled) mice. For diet-induced obesity (DIO), WT mice were fed chow (n=5) or HFD (n=6) for 10 weeks. For genetic obesity, WT (n=5), ob/ob (n=3), or db/db (n=6) mice were fed standard chow. Data represent mean  $\pm$  SEM. \* $p < 0.05$ , \*\*\* $p < 0.001$ , obese vs. lean, two-tailed unpaired Student's t-test.

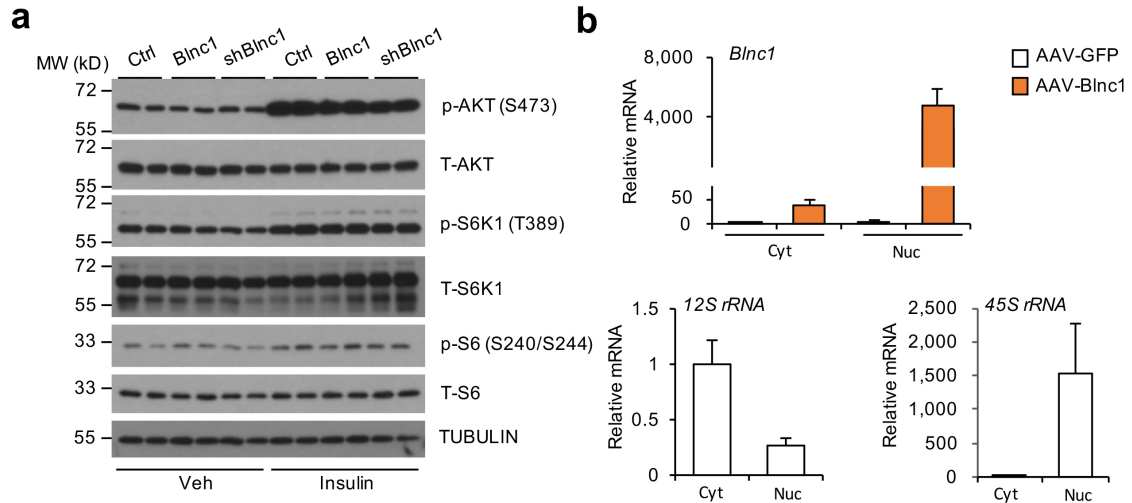

**Supplementary Figure. 2. Subcellular localization of Blnc1 and its effects on insulin signaling.** **a** Immunoblots of total lysates from primary hepatocytes transduced with GFP (Ctrl), Blnc1 or shBlnc1 adenovirus and treated with 100nM insulin for 15 min. **b** qPCR analyses Blnc1 expression in the cytosolic (Cyt) and nuclear (Nuc) fractions of mouse livers transduced with AAV-GFP (open, n=5) and AAV-Blnc1 (filled, n=7). Mitochondrial 12S rRNA and 45S rRNA were included as control for the cytosolic and nuclear fractions, respectively.

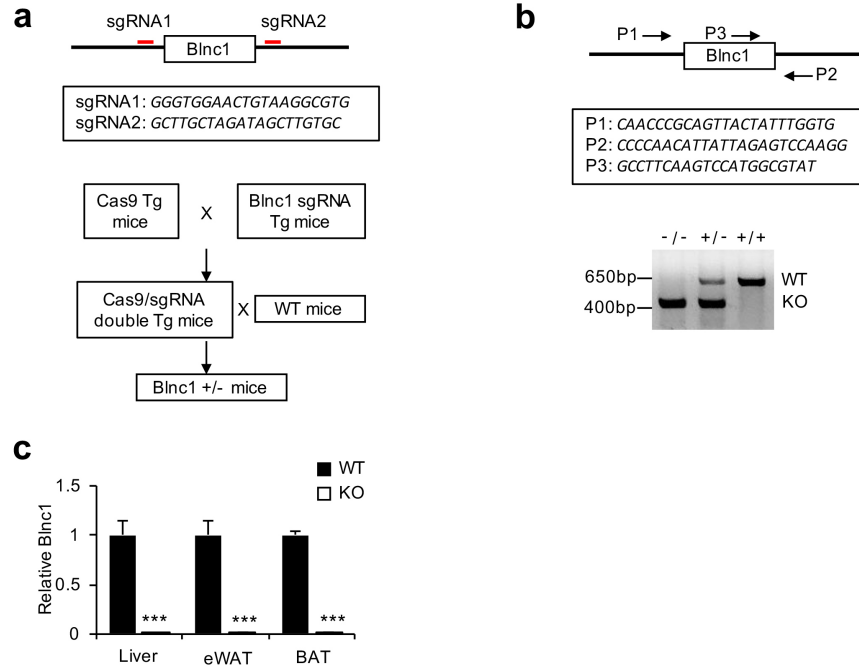

**Supplementary Figure. 3. Generation of whole body Blnc1 knockout mice. a** A schematic of the strategy for generating Blnc1 KO mice using CRISPR/Cas9. **b** Genotyping PCR. WT and KO bands were amplified using the indicated primers. **c** qPCR analysis of Blnc1 expression in WT (filled, n=5) and KO (open, n=5) mouse tissues. Data represent mean  $\pm$  SEM. \*\*\* $p < 0.001$ , WT vs. KO, two-tailed unpaired Student's t-test.



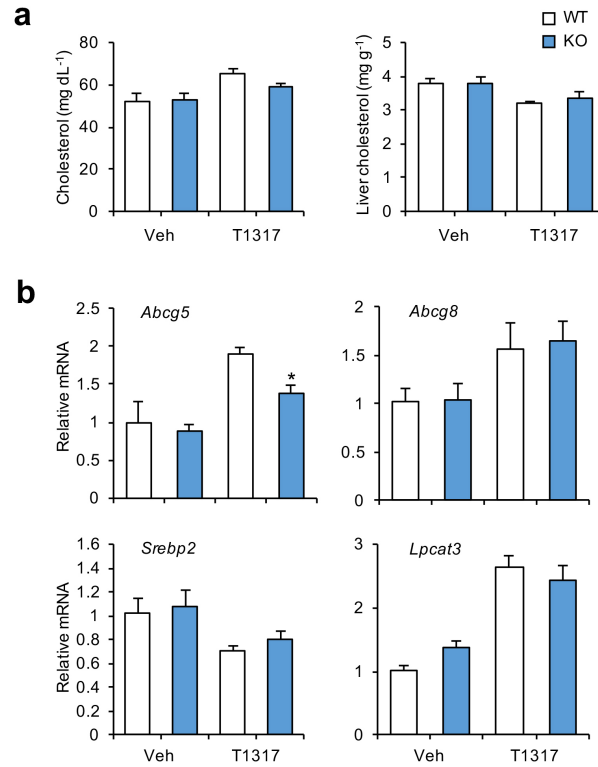

**Supplementary Figure. 4 Effects of Blnc1 on cholesterol metabolism and hepatic gene expression.** **a** Plasma and liver cholesterol content from WT (open) or Blnc1 KO (blue) mice receiving oral gavage of Veh (WT, n=4; KO, n=3) or T1317 (WT, n=3; KO, n=4) for 4 days. **b** qPCR analysis of hepatic gene expression in gavaged mice. Data represent mean  $\pm$  SEM. \* $p < 0.05$ , WT vs. KO, two-tailed unpaired Student's t-test.

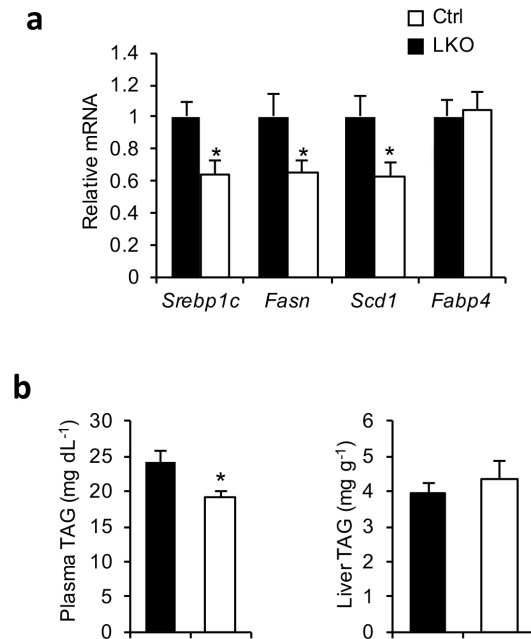

**Supplementary Figure. 5. Blnc1 inactivation impairs lipogenic gene induction during refeeding.** **a** qPCR analysis of hepatic gene expression in Ctrl (filled, n=9) or Blnc1 LKO (open, n=9) mice subjected to overnight fasting (16 hrs) followed by 8 hrs of refeeding. **b** Plasma and liver TAG content after refeeding. Data represent mean  $\pm$  SEM. \* $p < 0.05$ , Ctrl vs. LKO, two-tailed unpaired Student's t-test.

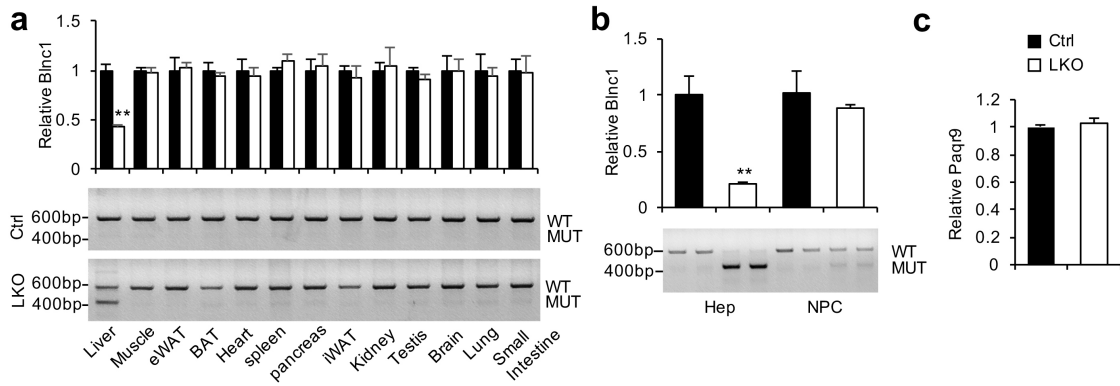

**Supplementary Figure. 6. Liver-specific inactivation of Blnc1.** **a** qPCR analysis of liver Blnc1 expression (top) and genotyping PCR (bottom) in tissues from Ctrl (filled, n=3) and Blnc1 LKO (open, n=3) mice. **b** qPCR analysis of Blnc1 expression in isolated hepatocytes (Hep) or non-parenchymal cells (NPC) from Ctrl (n=3) and LKO (n=3) mouse livers. **c** qPCR analysis of Paqr9 expression. Data in **b-c** represent mean  $\pm$  SEM. \*\* $p < 0.01$ , Ctrl vs. LKO, two-tailed unpaired Student's t-test.

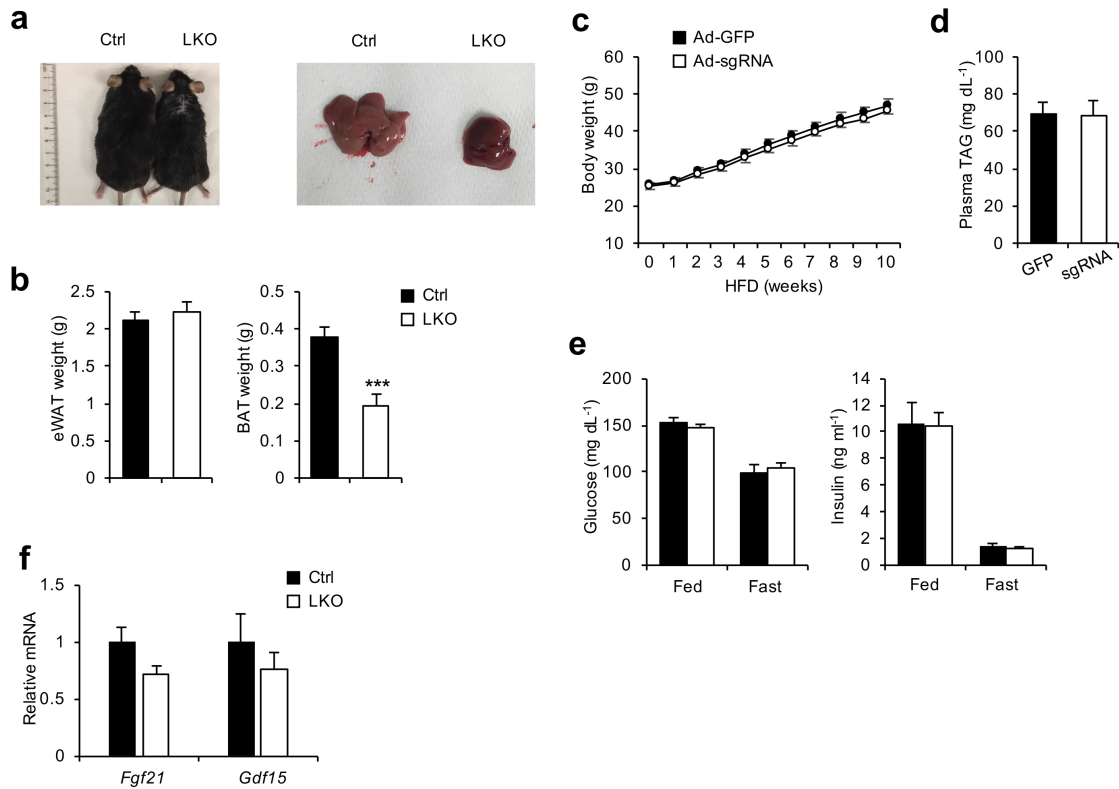

**Supplementary Figure 7. Hepatic expression of Blnc1 sgRNA does not alter metabolic parameters.** **a** Appearance and liver morphology of Ctrl or LKO mice fed HFD for 10 weeks. **b** epididymal (eWAT) and brown fat (BAT) weight from Ctrl (filled, n=9) and LKO (open, n=9) mice fed HFD for 19 weeks. **c** Body weight of mice transduced with Ad-GFP (filled, n=6) or Ad-sgRNA (open, n=6) adenovirus and fed HFD for 10 weeks. **d** Plasma TAG levels. **e** Blood glucose (left) and plasma insulin (right) concentrations. **f** qPCR analysis of hepatic *Fgf21* and *Gdf15* expression in Ctrl (filled, n=9) and LKO (open, n=9) mice fed HFD for 19 weeks. Data in **b** represent mean  $\pm$  SEM. \*\*\* $p < 0.001$ , Ctrl vs. LKO, two-tailed unpaired Student's t-test.

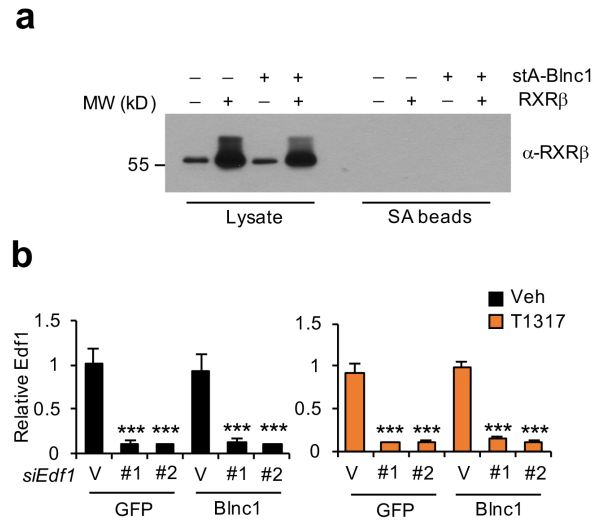

**Supplementary Figure. 8. Physical interaction between Blnc1 and transcription factors.** **a** Immunoblots of total lysates and precipitated proteins (SA beads) from HEK293T cells transiently transfected as indicated. **b** qPCR analysis of gene expression in transduced hepatocytes transfected with control siRNA (V) or siRNAs targeting EDF1 (#1 and #2) followed by treatments with Veh or 5 $\mu$ M T1317 for 24 hrs. Data represent mean  $\pm$  SD (n=3). \*\*\*p < 0.001, Ctrl vs. #1 or #2, two-way ANOVA.

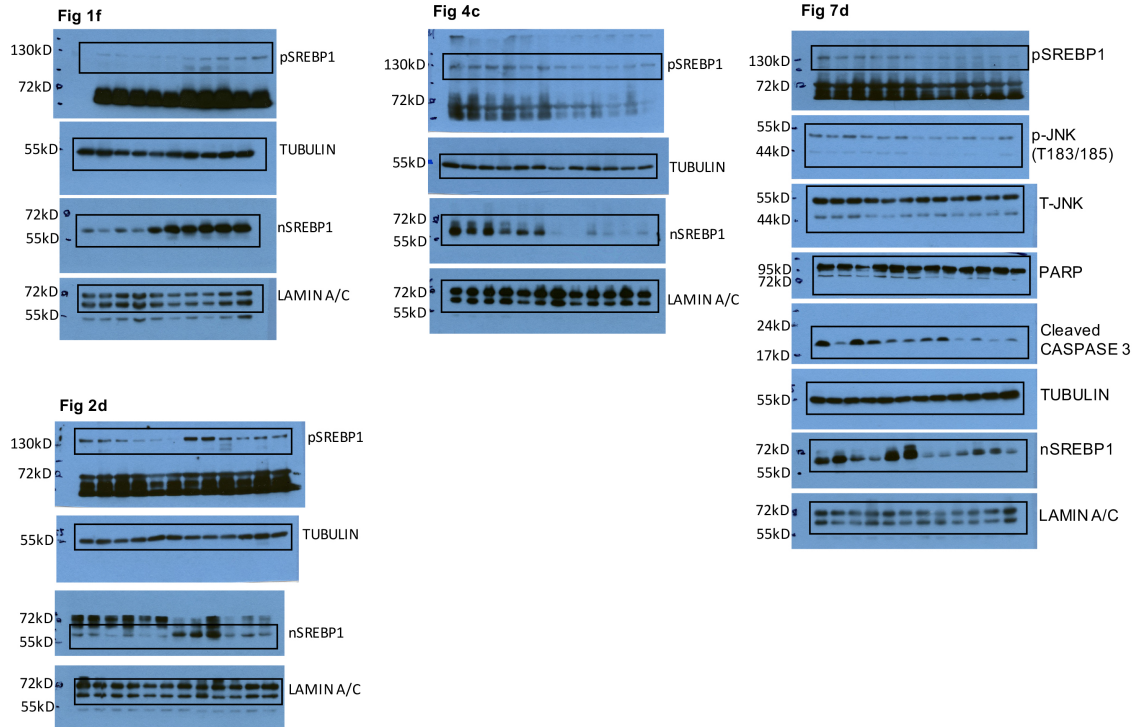

**Supplementary Figure 9 Uncropped blots scans for Figure 1f, 2d, 4c and 7d.**

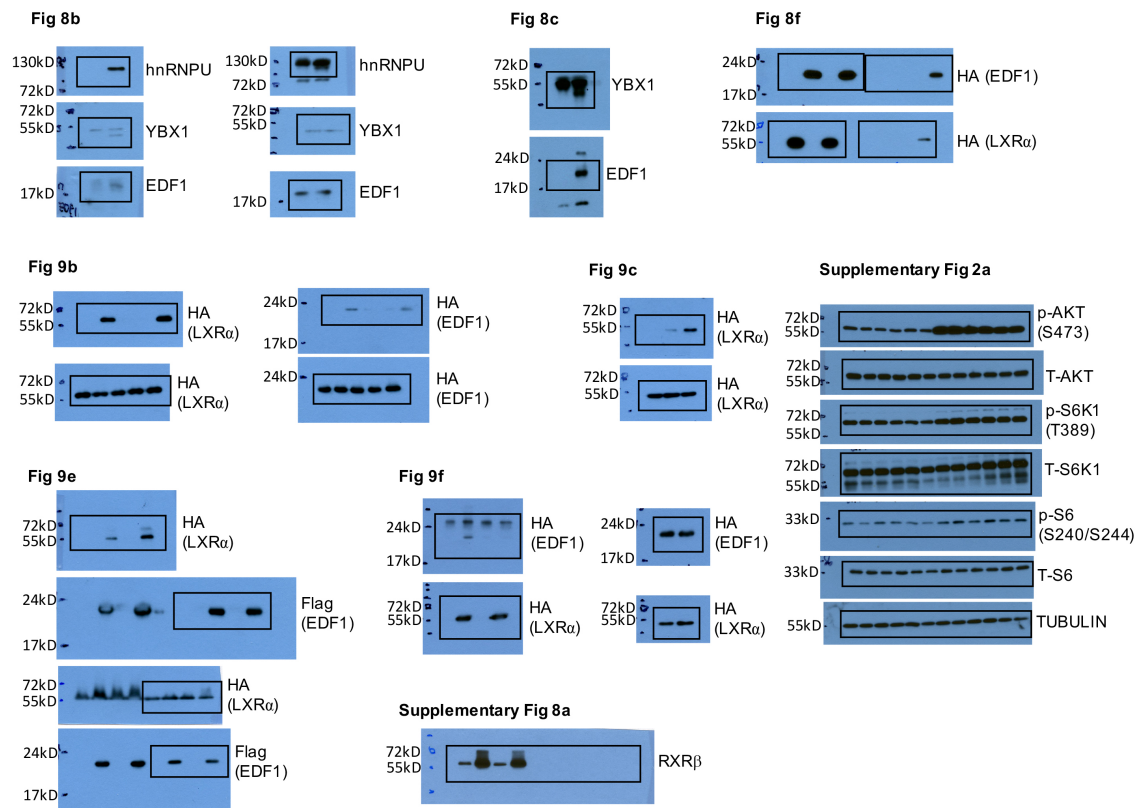

**Supplementary Figure 10 Uncropped blots scans for Figure 8b-c, 8f, 9b-c, 9e-f and Supplementary Figure 2a and 8d.**

**Supplementary Fig 3b**

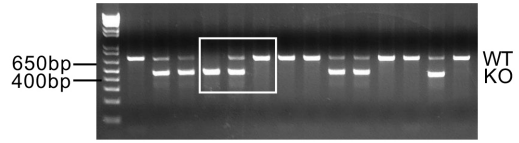

**Supplementary Fig 6a**

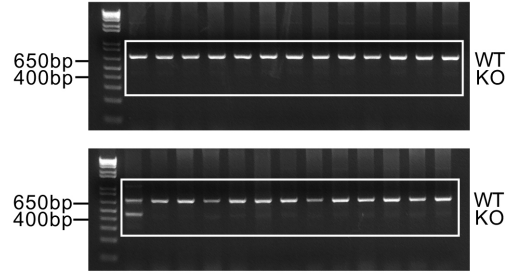

**Supplementary Fig 6b**

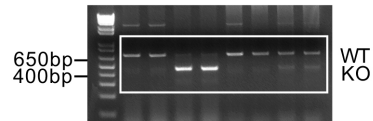

**Supplementary Figure 11 Uncropped gels scans for Supplementary Figure 3b, 6a and 6b.**



**Supplementary Table 1. RNAseq expression values for hepatic genes in NASH-fed mice.**

|           | WT-1   | WT-2   | WT-3   | LKO-1  | LKO-2  | LKO-3  |      | pvalue  |
|-----------|--------|--------|--------|--------|--------|--------|------|---------|
| Cyp17a1   | 3198   | 2179   | 2796   | 1722   | 950    | 1008   | Down | 3.0E-20 |
| Acnat2    | 2037   | 1729   | 2419   | 1330   | 1164   | 981    | Down | 2.2E-08 |
| Orm2      | 7851   | 10192  | 8221   | 6467   | 6637   | 4900   | Down | 3.2E-07 |
| Slc3a1    | 2289   | 2389   | 2294   | 1804   | 1429   | 1509   | Down | 1.2E-06 |
| Ccrn4l    | 4139   | 4078   | 4528   | 2516   | 2898   | 3584   | Down | 1.3E-06 |
| Apoa4     | 586951 | 520148 | 509011 | 364798 | 369167 | 439268 | Down | 4.9E-06 |
| Lcn2      | 16325  | 17679  | 12175  | 9593   | 13576  | 9961   | Down | 6.9E-06 |
| Lyve1     | 2506   | 2019   | 2697   | 1340   | 1512   | 2050   | Down | 7.2E-06 |
| Anxa2     | 16946  | 17169  | 15663  | 10565  | 14565  | 11387  | Down | 7.5E-06 |
| Wfdc2     | 3096   | 2453   | 2734   | 1833   | 2137   | 1542   | Down | 8.1E-06 |
| Srebf1    | 52837  | 43792  | 48788  | 34010  | 34234  | 40659  | Down | 1.3E-05 |
| Abhd2     | 4007   | 4097   | 4761   | 2606   | 3534   | 3073   | Down | 1.4E-05 |
| Acot2     | 2068   | 1788   | 2130   | 1242   | 1479   | 1529   | Down | 4.7E-05 |
| Gbp2      | 1879   | 1802   | 2097   | 1352   | 1454   | 1440   | Down | 5.7E-05 |
| Egr1      | 1671   | 2413   | 2219   | 1176   | 1692   | 1812   | Down | 6.9E-05 |
| Jun       | 4306   | 4667   | 4511   | 2285   | 3333   | 3995   | Down | 1.0E-04 |
| Col1a2    | 15299  | 12115  | 14751  | 9164   | 11636  | 9486   | Down | 1.2E-04 |
| Bcl6      | 2574   | 2089   | 1477   | 1341   | 1692   | 1181   | Down | 1.4E-04 |
| Slc16a5   | 3218   | 2740   | 3915   | 2530   | 2314   | 1922   | Down | 1.5E-04 |
| Cxcl9     | 3695   | 3636   | 3764   | 3039   | 2916   | 2538   | Down | 1.5E-04 |
| Igtp      | 4009   | 3746   | 4396   | 3247   | 3078   | 2976   | Down | 1.5E-04 |
| Fgl1      | 33443  | 43549  | 27964  | 23287  | 28993  | 26252  | Down | 1.6E-04 |
| Ccdc80    | 5154   | 4925   | 4986   | 3375   | 4443   | 3525   | Down | 1.6E-04 |
| Col3a1    | 35709  | 28524  | 36093  | 23143  | 27848  | 21523  | Down | 1.7E-04 |
| Mt1       | 7923   | 8223   | 7006   | 7065   | 6138   | 3822   | Down | 1.8E-04 |
| Epha2     | 2530   | 2419   | 2307   | 1551   | 1805   | 1978   | Down | 1.8E-04 |
| Frm4b     | 7171   | 6389   | 7344   | 4863   | 5252   | 6151   | Down | 2.0E-04 |
| Krt8      | 35631  | 37481  | 34188  | 23573  | 30674  | 29597  | Down | 2.1E-04 |
| Col4a1    | 9800   | 10330  | 10599  | 7029   | 9490   | 6974   | Down | 2.2E-04 |
| Ubd       | 3187   | 3519   | 2490   | 2256   | 3084   | 1774   | Down | 3.2E-04 |
| Ppp1r3b   | 15045  | 14685  | 14265  | 10236  | 9475   | 13625  | Down | 3.3E-04 |
| Serpinh1  | 4372   | 4651   | 4380   | 2979   | 3927   | 3585   | Down | 4.0E-04 |
| Sdc1      | 14301  | 13814  | 15708  | 11775  | 12039  | 11174  | Down | 4.5E-04 |
| Sall1     | 2036   | 1908   | 2015   | 1647   | 1539   | 1460   | Down | 7.1E-04 |
| Aldh1b1   | 10403  | 6830   | 11262  | 8028   | 6583   | 6151   | Down | 8.5E-04 |
| Col5a2    | 2168   | 1881   | 2335   | 1501   | 1759   | 1532   | Down | 1.0E-03 |
| Cd93      | 2368   | 2477   | 2636   | 1823   | 2149   | 1949   | Down | 1.2E-03 |
| H2-Q1     | 7890   | 6747   | 8055   | 4907   | 6139   | 6694   | Down | 1.6E-03 |
| Stk38l    | 1738   | 1367   | 1663   | 1529   | 1046   | 1096   | Down | 1.7E-03 |
| Tnfrsf12a | 1723   | 1749   | 1475   | 983    | 1619   | 1078   | Down | 1.7E-03 |
| Tfrc      | 3686   | 4175   | 5202   | 3801   | 2811   | 3081   | Down | 2.0E-03 |
| Postn     | 3140   | 2497   | 2721   | 1930   | 2417   | 1983   | Down | 2.0E-03 |

|          |        |        |        |        |        |         |      |         |
|----------|--------|--------|--------|--------|--------|---------|------|---------|
| Acsl3    | 2739   | 3362   | 3874   | 2621   | 2630   | 2201    | Down | 2.1E-03 |
| Loxl2    | 1295   | 1244   | 1353   | 896    | 1124   | 952     | Down | 2.4E-03 |
| Col5a1   | 2455   | 2206   | 2485   | 1613   | 2112   | 1791    | Down | 2.5E-03 |
| Clca3a1  | 2186   | 2015   | 2272   | 1542   | 1821   | 1760    | Down | 2.8E-03 |
| Synpo    | 2639   | 2488   | 2969   | 1796   | 2487   | 1907    | Down | 3.0E-03 |
| Ccr2     | 2344   | 2185   | 2423   | 1620   | 1934   | 1994    | Down | 3.4E-03 |
| Klf10    | 2345   | 3051   | 1920   | 1992   | 2177   | 1665    | Down | 3.5E-03 |
| Col6a2   | 2795   | 2476   | 2466   | 1717   | 2383   | 1882    | Down | 3.6E-03 |
| Mt2      | 3618   | 3891   | 3464   | 3513   | 3087   | 1794    | Down | 4.7E-03 |
| Slc1a4   | 1172   | 1289   | 1351   | 989    | 1072   | 932     | Down | 4.8E-03 |
| Sds      | 9560   | 7303   | 11554  | 9158   | 6302   | 6782    | Down | 5.6E-03 |
| Cyr61    | 1561   | 1602   | 1175   | 1142   | 1191   | 1095    | Down | 7.1E-03 |
| Ephb2    | 2372   | 2463   | 1734   | 1292   | 1821   | 1817    | Down | 7.5E-03 |
| Acly     | 21301  | 20812  | 16167  | 13785  | 15194  | 17416   | Down | 9.6E-03 |
| Ugt1a9   | 19356  | 5927   | 18166  | 6205   | 5217   | 10099   | Down | 1.6E-02 |
| Tubb2a   | 13626  | 12745  | 10127  | 5584   | 8398   | 8185    | Down | 1.7E-02 |
| Cebpd    | 1036   | 1268   | 1193   | 631    | 1139   | 1028    | Down | 1.7E-02 |
| Cpxm1    | 2115   | 1906   | 2119   | 1499   | 2039   | 1343    | Down | 1.7E-02 |
| Hk2      | 965    | 1459   | 1024   | 576    | 1205   | 968     | Down | 2.0E-02 |
| Dusp1    | 2405   | 3026   | 1965   | 1523   | 2216   | 2166    | Down | 2.5E-02 |
| Scand1   | 1883   | 1700   | 1582   | 947    | 1526   | 1553    | Down | 2.5E-02 |
| Lgals3   | 5628   | 5052   | 5529   | 2831   | 4872   | 3159    | Down | 2.6E-02 |
| Cntnap1  | 2902   | 3352   | 2198   | 1845   | 2315   | 2560    | Down | 3.1E-02 |
| Col1a1   | 15541  | 11645  | 14716  | 8006   | 10928  | 8500    | Down | 3.1E-02 |
| Gm6484   | 3069   | 3134   | 1210   | 1311   | 1125   | 1280    | Down | 3.8E-02 |
|          |        |        |        |        |        |         |      |         |
| Hamp     | 14250  | 14791  | 13198  | 24524  | 23412  | 24545   | Up   | 3.6E-19 |
| Fbxo21   | 5930   | 5709   | 5295   | 8529   | 7124   | 7655    | Up   | 5.9E-07 |
| Nxpe2    | 2205   | 2117   | 2021   | 3086   | 2768   | 3353    | Up   | 7.0E-07 |
| Cyp3a11  | 185059 | 138054 | 225542 | 272482 | 216267 | 264795  | Up   | 1.7E-06 |
| Srd5a1   | 4596   | 4497   | 4893   | 7569   | 5065   | 7938    | Up   | 5.3E-06 |
| Nudt7    | 30016  | 33927  | 25673  | 48930  | 37380  | 44483   | Up   | 5.8E-06 |
| Npr2     | 3130   | 3416   | 2540   | 5205   | 3739   | 4437    | Up   | 2.2E-05 |
| Fcna     | 2549   | 2576   | 2252   | 3855   | 2964   | 3406    | Up   | 3.4E-05 |
| Cib3     | 1127   | 1494   | 986    | 1260   | 2641   | 1573    | Up   | 3.9E-05 |
| Cyp2e1   | 474764 | 469700 | 516727 | 744646 | 552886 | 643155  | Up   | 4.5E-05 |
| Mbd1     | 3064   | 3035   | 2929   | 3914   | 3702   | 4622    | Up   | 4.5E-05 |
| Ccbl1    | 4095   | 4073   | 4435   | 6442   | 4795   | 5773    | Up   | 5.3E-05 |
| Mup20    | 552351 | 786771 | 623800 | 835198 | 829270 | 1087553 | Up   | 6.4E-05 |
| Nkiras1  | 1906   | 1873   | 2177   | 2324   | 2416   | 3147    | Up   | 1.3E-04 |
| Ces2c    | 1684   | 1717   | 1678   | 3114   | 1889   | 2375    | Up   | 1.7E-04 |
| Clec4f   | 11585  | 8819   | 7087   | 14503  | 9864   | 13120   | Up   | 3.5E-04 |
| 28104740 | 1906   | 2365   | 2247   | 3455   | 2790   | 2762    | Up   | 3.7E-04 |
| Wfdc17   | 1985   | 1997   | 1584   | 2606   | 2242   | 2641    | Up   | 5.7E-04 |
| Plcx2    | 4479   | 5977   | 4610   | 7975   | 6154   | 6340    | Up   | 7.6E-04 |

|          |       |       |       |       |       |       |    |         |
|----------|-------|-------|-------|-------|-------|-------|----|---------|
| Cish     | 1071  | 2163  | 1203  | 2052  | 3186  | 1201  | Up | 8.1E-04 |
| 2010315f | 1197  | 1249  | 1270  | 1930  | 1416  | 1618  | Up | 1.4E-03 |
| Slc1a2   | 14601 | 13788 | 12318 | 21020 | 13744 | 18380 | Up | 1.4E-03 |
| Ugt1a6b  | 1335  | 2381  | 1384  | 2690  | 2374  | 2087  | Up | 1.4E-03 |
| Eif4ebp3 | 837   | 1470  | 1061  | 1377  | 1388  | 1648  | Up | 9.7E-03 |
| Cyp2c44  | 9952  | 11402 | 13528 | 22546 | 15554 | 18075 | Up | 1.4E-02 |
| Cyp4a12b | 2311  | 3975  | 2540  | 8777  | 4562  | 12357 | Up | 1.7E-02 |
| Cyp2c50  | 10716 | 11702 | 16725 | 30317 | 14715 | 22847 | Up | 3.2E-02 |
| Gpcpd1   | 10316 | 11584 | 10521 | 20061 | 13000 | 15726 | Up | 3.3E-02 |
| Sult2a8  | 8501  | 14896 | 9631  | 42300 | 16273 | 24110 | Up | 3.4E-02 |
| Cyp4a12a | 7720  | 9533  | 4316  | 19873 | 11601 | 31905 | Up | 3.7E-02 |
| Elovl3   | 1544  | 2047  | 1455  | 3901  | 2026  | 3757  | Up | 3.7E-02 |
| Gbp11    | 645   | 955   | 779   | 2287  | 1601  | 826   | Up | 4.9E-02 |

**Supplementary Table 2: List of primer sequences.**

| <b>Gene</b>    | <b>5' Primer</b>        | <b>3' Primer</b>        |
|----------------|-------------------------|-------------------------|
| <b>qPCR</b>    |                         |                         |
| Blnc1          | CAAGGAAGTCATGAGCCCAATG  | TAAAGGCTTCAACGGTGGCTG   |
| Srebp1c        | ATCGGCGCGGAAGCTGTCCG    | GGGAAGTCACTGTCTTGTTG    |
| Fasn           | GGTTACTGTGCTAGGTGTTG    | TCCAGGCGCATGAGGCTCAGC   |
| Scd1           | GCTGGAGTACGTCTGGAGGAA   | TCCCGAAGAGGCAGGTGTAG    |
| Fsp27          | TCGACCTGTACAAGCTGAACCCT | AGGTGCCAAGCAGCATGTGACC  |
| Ucp1           | GGCATTCAAGAGGCAAATCAGCT | CAATGAACACTGCCACACCTC   |
| Cidea          | GCAGCCTGCAGGAACTTATCAGC | GATCATGAAATGCGTGTTGTCC  |
| Ppar $\alpha$  | GCAGTGCCCTGAACATCGA     | CGCCGAAAGAAGCCCTTAC     |
| Ebf2           | GGAACCGGAACGAGACCCCT    | TCCCTTGGGTTTCCCGCTGT    |
| Prdm16         | CGGAAGAGCGTGAGTACAAATG  | TCCGTGAACACCTTGACACAGT  |
| Cox7a1         | GTCTCCCAGGCTCTGGTCCG    | CTGTACAGGACGTTGTCCATTC  |
| Pgc-1 $\alpha$ | AGCCGTGACCACTGACAACGAG  | GCTGCATGGTTCTGAGTGCTAAG |
| Dio2           | GATGCTCCCAATTCCAGTGT    | TGAACCAAAGTTGACCACCA    |
| Dgat2          | TACTCCAAGCCCATCACCAC    | CAGTTCACCTCCAGCACCTC    |
| Gck            | TCTGAGTGCATCTCTGACTTCC  | CTTGTCTATGTCTTCGTGCC    |
| Pfkl           | AAGCCTATCTCATCCAGCTACG  | CCCATCTTGCTACTCAGGATTC  |
| ApoA4          | ATCAAGAAGGAGCTGGAGGA    | GGTGCTCCTGCAACTTCTGC    |
| Fabp4          | TGCCTTTGTGGGAACCTG      | GCTTGTCAACATCTCGTTTTC   |
| Ppar $\gamma$  | CCGTAGAAGCCGTGCAAGAG    | GGAGGCCAGCATCGTGTAGA    |
| Adgre1         | ATCCTTGGCCATCCGGCAGA    | GCAAAGCCAGGGTGGCAAGT    |
| Ccr2           | AAGAGGGCATTGGATTCACCACA | GCCGTGGATGAACTGAGGTAACA |
| Cx3cr1         | GTTTTCTGCAAGAATCGCAAG   | CCTCAGGTCCCTCTTCATGTCA  |
| Lcn2           | GGCAATGCGGTCCAGAAAA     | CCCTGGAGCTTGGAACAAATG   |
| Mmp12          | TGGAGCTCACGGAGACTTCAA   | CAACAAGGAAGAGGTTTGTGCC  |
| Mac2           | CAGAGAGCACTACCCAGGAAAAT | TGAGGGTTTGGGTTTCCAGAG   |
| Col1a1         | AAGAGGCGAGAGAGGTTTCC    | AGAACCATCAGCACCTTTGG    |
| Col1a2         | AGGTCCTAATGGAGATGCCG    | CACAGGGCCTTCTTTACCAG    |

|                  |                       |                       |
|------------------|-----------------------|-----------------------|
| Acta2            | CTGACAGAGGCACCACTGAA  | CATCTCCAGAGTCCAGCACA  |
| <b>ChIP</b>      |                       |                       |
| Srebp1c<br>-ChIP | GACGCCGTCCGGATTCCGG   | CGCCTTTAACCGCGTCTGCGC |
| 18s-<br>ChIP     | AGTCCCTGCCCTTTGTACACA | CGATCCGAGGGCCTCACT    |
